# Supplementary material for: Customer Recognition in Experience vs. Inspection Good Markets
Source: Atypon-hosted journal article supplement (doi:10.1287/mnsc.2014.2114), 2015-04-10
Supplement: mnsc.2014.2114-sm-appendix.pdf [file mnsc.2014.2114-sm-appendix.pdf]

# Online Appendix for "Customer Recognition in Experience versus Inspection Good Markets"

Bing Jing

Cheong Kong Graduate School of Business

Beijing, 100738, People's Republic of China,      bjing@ckgsb.edu.cn

November 5, 2014

This technical online Appendix contains the proofs of Proposition 2 and Lemma TA5. Lemmas TA1-TA4 below are pivotal to the proof of Proposition 2.

**Lemma TA1.** *Suppose  $0 \leq \lambda \leq 1 - \frac{\sqrt{5}}{5} \approx 0.553$  and  $\frac{\lambda(1-\lambda)}{2-3\lambda} \leq \frac{t}{H-L} \leq \frac{(1-\lambda)(6-5\lambda)}{2}$ . There is a SPE where each firm charges  $a^D = \frac{2(2-\lambda^2)t}{3(1-\lambda)} + \frac{2\lambda(H-L)}{3}$  in period 1 and  $b^S = \frac{1}{3} \left[ \frac{t}{1-\lambda} + \lambda(H-L) \right]$  and  $b^R = \frac{1}{3} \left[ \frac{2t}{1-\lambda} - \lambda(H-L) \right]$  to new and repeat customers, respectively, in period 2. In equilibrium, only some of the consumers realizing a low value from the first purchase will switch brand, and those realizing a high value never switch in period 2.*

**Proof.** We seek an equilibrium where only some of the consumers realizing a low value switch brands. We first look at the period-2 game. Without loss of generality, suppose consumers in  $[0, \theta^D]$  have purchased product 0 and consumers in  $(\theta^D, 1]$  have purchased product 1 in period 1. Let  $b_i^S$  and  $b_i^R$  denote firm  $i$ 's ( $i = 0, 1$ ) prices for switchers and repeat buyers, respectively. Suppose a consumer  $x$  buying product 0 in the first period has realized a low value. In period 2, she will repeat buy product 0 if  $L - b_0^R - tx \geq \bar{v} - b_1^S - t(1-x)$  or

equivalently  $x \leq x_0^D$ , where

$$x_0^D = \frac{b_1^S - b_0^R + t - \lambda(H - L)}{2t}.$$

Otherwise, she will switch to product 1. Suppose a consumer  $x$  buying product 1 in the first period has realized a low value. In period 2, she will repeat buy product 1 if  $L - b_1^R - t(1 - x) \geq \bar{v} - b_0^S - tx$  or equivalently  $x \geq x_1^D$ , where

$$x_1^D = \frac{b_1^R - b_0^S + t + \lambda(H - L)}{2t}.$$

She will switch to product 0 otherwise.

The firms' period-2 profit functions are

$$R_0^D = [\lambda\theta^D + (1 - \lambda)x_0^D]b_0^R + (1 - \lambda)(x_1^D - \theta^D)b_0^S$$

and

$$R_1^D = [\lambda(1 - \theta^D) + (1 - \lambda)(1 - x_1^D)]b_1^R + (1 - \lambda)(\theta^D - x_0^D)b_1^S.$$

In the expression of  $R_0^D$ ,  $\lambda\theta^D$  is the consumers who purchased product 0 previously and realized a high value, and  $(1 - \lambda)x_0^D$  captures the consumers who purchased product 0 previously, realized a low value but are located sufficiently close to product 0. Both groups will repeat purchase product 0. Those who purchased product 1, realized a low value and are located sufficiently distant from product 1 (those in  $(\theta^D, x_1^D)$ ) will now switch to product 0. The number of such switchers is  $(1 - \lambda)(x_1^D - \theta^D)$ . Each term in  $R_1^D$  has an analogous interpretation.

For  $i = 0, 1$ , we can verify that  $\frac{\partial^2 R_i}{\partial (b_i^R)^2} = \frac{\partial^2 R_i}{\partial (b_i^S)^2} = \frac{-(1-\lambda)}{t} < 0$  and  $\frac{\partial^2 R_i}{\partial b_i^R \partial b_i^S} = 0$ . The Hessian matrix of each firm's period-2 objective is thus negative definite. The period-2 equilibrium readily follows from the first-order conditions:  $b_0^S = \frac{1}{3} \left[ \frac{2(1-(2-\lambda)\theta^D)t}{1-\lambda} + t + \lambda(H - L) \right]$ ,  $b_0^R = \frac{1}{3} \left[ \frac{2(1+\lambda)\theta^D t}{1-\lambda} + t - \lambda(H - L) \right]$ ,  $b_1^S = \frac{1}{3} \left[ \frac{2(2-\lambda)\theta^D t}{1-\lambda} - t + \lambda(H - L) \right]$ , and  $b_1^R = \frac{1}{3} \left[ \frac{2(2-(1+\lambda)\theta^D)t}{1-\lambda} - t - \lambda(H - L) \right]$

Substituting these prices into  $R_0^D$  and  $R_1^D$  above and rearranging terms, we have firm  $i$ 's ( $i = 0, 1$ ) period-2 equilibrium profits  $R_i^D = \frac{(1-\lambda)[(b_i^R)^2 + (b_i^S)^2]}{2t}$ .

We now turn to period 1. Observing the period-1 prices  $a_0$  and  $a_1$ , each consumer decides which product to buy. Her objective is to maximize expected total surplus over both periods, anticipating the period-2 price equilibrium. To derive the period-1 consumer choice rule, it suffices to identify the consumer indifferent between products 0 and 1 in period 1,  $\theta^D$ . From the discussions above, we see that if consumer  $\theta^D$  purchases product  $i$  ( $i = 0, 1$ ) in period 1 and realizes a low value, she will switch to the other product in period 2. Her expected total surplus of buying product 0 in period 1 is  $V_0(\theta^D) = (\bar{v} - a_0 - t\theta^D) + \lambda(H - b_0^R - t\theta^D) + (1 - \lambda)[\bar{v} - b_1^S - t(1 - \theta^D)]$ , and that of buying product 1 in period 1 is  $V_1(\theta^D) = [\bar{v} - a_1 - t(1 - \theta^D)] + \lambda[H - b_1^R - t(1 - \theta^D)] + (1 - \lambda)[\bar{v} - b_0^S - t\theta^D]$ . Setting  $V_0(\theta^D) = V_1(\theta^D)$  and substituting in  $b_0^S, b_0^R, b_1^S,$  and  $b_1^R$  yield

$$\theta^D = \frac{1}{2} - \frac{3(1 - \lambda)(a_0 - a_1)}{4(2 + \lambda - \lambda^2)t}.$$

In period 1, firms 0 and 1 choose prices  $a_0$  and  $a_1$  to maximize their total expected profits  $\pi_0^D = \theta^D a_0 + R_0^D$  and  $\pi_1^D = (1 - \theta^D)a_1 + R_1^D$ , respectively. It is straightforward to verify that for  $i = 0, 1$ ,  $\frac{d^2 \pi_i}{da_i^2} = \frac{-(1-\lambda)[7+8\lambda(1-\lambda)]}{4(2+\lambda-\lambda^2)t} < 0$ , i.e.,  $\pi_i$  is strictly concave in  $a_i$ . The firms' FOCs lead to a candidate SPE:  $a_0 = a_1 = a^D$ , where

$$a^D = \frac{2(2 - \lambda^2)t}{3(1 - \lambda)} + \frac{2\lambda(H - L)}{3},$$

and  $b_0^S = b_1^S = b^S$  and  $b_0^R = b_1^R = b^R$ , where

$$b^S = \frac{1}{3} \left[ \frac{t}{1 - \lambda} + \lambda(H - L) \right] \text{ and } b^R = \frac{1}{3} \left[ \frac{2t}{1 - \lambda} - \lambda(H - L) \right].$$

Each firm makes total profits  $\pi^D = \frac{(2-\lambda^2)t}{3(1-\lambda)} + \frac{\lambda(H-L)}{3} + R^D$ , where  $R^D$  is its period-2 profits

$$R^D = \frac{1}{18(1-\lambda)t} \{ [2t - \lambda(1-\lambda)(H-L)]^2 + [t + \lambda(1-\lambda)(H-L)]^2 \}.$$

We can check that  $x_0^D < \frac{1}{2} < x_1^D$  always holds, that  $x_0^D \geq 0 \Leftrightarrow x_1^D \leq 1 \Leftrightarrow \frac{t}{H-L} \geq \frac{\lambda(1-\lambda)}{2-3\lambda}$ , that  $H - b^R \geq \bar{v} - b^S \Leftrightarrow \frac{t}{H-L} \leq (1-\lambda)(3-\lambda)$  (i.e., those realizing a high value do not switch). For  $\frac{\lambda(1-\lambda)}{2-3\lambda} < (1-\lambda)(3-\lambda)$ , we need  $\lambda \leq 2 - \sqrt{2}$ .

Next, we still need to ensure that neither firm has an incentive to unilaterally deviate from the period-2 equilibrium above. Due to symmetry, it suffices to rule out firm 0's such incentive. We see from above that each firm's period-2 price for switchers ( $b^S$ ) is independent of that for repeat buyers ( $b^R$ ), as the two prices serve separate market segments. Below, we derive the conditions for firm 0 not to deviate from either price.

First, suppose firm 0 wishes to deviate to a different price for repeat customers,  $b_0^{RD}$ . From the above deduction, it is clear that firm 0 will not deviate to any  $b_0^{RD}$  that attracts all of its own H customers. Therefore, suppose  $b_0^{RD}$  is high enough such that firm 0 loses some of its H customers to firm 1, i.e.,  $H - \frac{t}{2} - b_0^{RD} < \lambda H + (1-\lambda)L - \frac{t}{2} - b^S \Leftrightarrow b_0^{RD} - b^S > (1-\lambda)(H-L)$ . Let  $y_0$  denote firm 0's H customer who is indifferent to repeat buying product 0 and switching to product 1, i.e.,  $H - ty_0 - b_0^{RD} = \lambda H + (1-\lambda)L - t(1-y_0) - b^S$ , which leads to  $y_0 = \frac{b^S - b_0^{RD} + t + (1-\lambda)(H-L)}{2t}$ . Firm 0's period-2 demand from repeat buyers is then  $D_0^{RD} = \lambda y_0 + (1-\lambda)x_0 = \frac{b^S - b_0^{RD} + t}{2t}$ , where  $x_0$  is as given above. By deviating, firm 0 wishes to maximize  $b_0^{RD} D_0^{RD}$ , which leads to the optimal deviating price,  $b_0^{RD} = \frac{b^S + t}{2}$ . When  $\lambda \leq 2 - \sqrt{2}$ , we have that  $b_0^{RD} - b^S > (1-\lambda)(H-L) \Leftrightarrow \frac{t}{H-L} > \frac{(1-\lambda)(6-5\lambda)}{2-3\lambda}$  and that  $\frac{(1-\lambda)(6-5\lambda)}{2-3\lambda} > (1-\lambda)(3-\lambda) \Leftrightarrow \lambda < 2$ , which always holds. Therefore, when  $\frac{t}{H-L} \leq (1-\lambda)(3-\lambda)$ , firm 0 will not unilaterally deviate from  $b^R$ .

Second, suppose firm 0 wishes to deviate to a different price for switchers,  $b_0^{SD}$ . From the above deduction, we see that firm 0 will not deviate to any  $b_0^{SD}$  that does not attract any of firm 1's H customers. Therefore, suppose  $b_0^{SD}$  is low enough such that it also attracts

some of firm 1's H customers, i.e.,  $\lambda H + (1 - \lambda)L - \frac{t}{2} - b_0^{SD} > H - \frac{t}{2} - b^R \Leftrightarrow b_0^{SD} - b^R \leq -(1 - \lambda)(H - L)$ . Let  $y_1$  denote firm 1's H customer who is indifferent to repeat buying product 1 and switching to product 0, i.e.,  $H - t(1 - y_1) - b^R = \lambda H + (1 - \lambda)L - ty_1 - b_0^{SD}$ , which leads to  $y_1 = \frac{b^R - b_0^{SD} + t - (1 - \lambda)(H - L)}{2t}$ . Firm 0's period-2 demand from switchers is  $D_0^{SD} = \lambda(y_1 - \frac{1}{2}) + (1 - \lambda)(x_1 - \frac{1}{2}) = \frac{b^R - b_0^{SD} + t}{2t} - \frac{1}{2}$ , where  $x_1$  is as given above. Firm 0 wishes to maximize  $b_0^{SD} D_0^{SD}$ , which leads to the optimal deviating price,  $b_0^{SD} = \frac{b^R}{2}$ . When  $\lambda \leq 2 - \sqrt{2}$ , we have that  $b_0^{SD} - b^R \leq -(1 - \lambda)(H - L) \Leftrightarrow \frac{t}{H - L} \geq \frac{(1 - \lambda)(6 - 5\lambda)}{2}$  and that  $\frac{(1 - \lambda)(6 - 5\lambda)}{2} < (1 - \lambda)(3 - \lambda)$  always holds. Therefore, when  $\frac{\lambda(1 - \lambda)}{2 - 3\lambda} \leq \frac{t}{H - L} \leq \frac{(1 - \lambda)(6 - 5\lambda)}{2}$ , firm 0 will not unilaterally deviate from  $b^S$ . Note that  $\frac{\lambda(1 - \lambda)}{2 - 3\lambda} \leq \frac{(1 - \lambda)(6 - 5\lambda)}{2} \Leftrightarrow 5\lambda^2 - 10\lambda + 4 > 0$ , which holds when  $\lambda \leq 1 - \frac{\sqrt{5}}{5}$ . Q.E.D.

**Lemma TA2.** *When  $\frac{t}{H - L} > \frac{3(2 - \lambda)}{2}$ , there is a SPE where each firm charges  $a^D = \frac{4t}{3}$  in period 1 and  $b^R = \frac{2t}{3}$  and  $b^S = \frac{t}{3}$  to repeat customers and switchers, respectively, in period 2, making total profits of  $\pi^D = \frac{17t}{18}$ . In equilibrium, some of the consumers realizing a low or high value switch brands in period 2.*

**Proof.** We now seek an equilibrium where some of the consumers realizing a low or high value switch brands in the second period. We start with analyzing the period-2 competition. Again, without loss suppose consumers in  $[0, \theta^D]$  have purchased product 0 and consumers in  $(\theta^D, 1]$  have purchased product 1 in period 1. Consider consumer  $x$  who has purchased product 0 previously and realized value L. In period 2, she will repeat purchase product 0 if and only if  $x \leq x_0^D$ . Similarly, if consumer  $x$  has purchased product 1 and realized value L in period 1, in period 2 she will repeat purchase product 1 if and only if  $x \geq x_1^D$ . Here  $x_0^D$  and  $x_1^D$  are as given in the proof of Lemma TA1 above.

If consumer  $x$  has purchased product 0 and realized value H, in period 2 she will repeat purchase product 0 if  $H - b_0^R - tx \geq \bar{v} - b_1^S - t(1 - x)$  or equivalently  $x \leq y_0^D$ , where

$$y_0^D = \frac{b_1^S - b_0^R + t + (1 - \lambda)(H - L)}{2t}.$$

Otherwise, she will switch to product 1. If consumer  $x$  has purchased product 1 and realized value  $H$ , in period 2 she will repeat purchase product 1 if  $H - b_1^R - t(1 - x) \geq \bar{v} - b_0^S - tx$  or equivalently  $x \geq y_1^D$ , where

$$y_1^D = \frac{b_1^R - b_0^S + t - (1 - \lambda)(H - L)}{2t}.$$

She will switch to product 0 otherwise.

Therefore, firms 0 and 1's period-2 profit functions are

$$R_0^D = [\lambda y_0^D + (1 - \lambda)x_0^D]b_0^R + [\lambda(y_1^D - \theta^D) + (1 - \lambda)(x_1^D - \theta^D)] b_0^S$$

and

$$R_1^D = [\lambda(1 - y_1^D) + (1 - \lambda)(1 - x_1^D)]b_1^R + [\lambda(\theta^D - y_0^D) + (1 - \lambda)(\theta^D - x_0^D)] b_1^S.$$

Since  $\frac{\partial^2 R_i}{\partial (b_i^R)^2} = \frac{\partial^2 R_i}{\partial (b_i^S)^2} = -\frac{1}{t}$  and  $\frac{\partial^2 R_i}{\partial b_i^R \partial b_i^S} = 0$ , each firm  $i$ 's period-2 Hessian matrix is negative definite. The unique period-2 price equilibrium then follows from the FOCs:  $b_0^S = t - \frac{4t\theta^D}{3}$ ,  $b_0^R = \frac{t+2t\theta^D}{3}$ ,  $b_1^S = \frac{-t+4t\theta^D}{3}$ , and  $b_1^R = t - \frac{2t\theta^D}{3}$ . We then obtain the period-2 profits:  $R_0^D = \frac{(b_0^R)^2 + (b_0^S)^2}{2t}$  and  $R_1^D = \frac{(b_1^R)^2 + (b_1^S)^2}{2t}$ .

We now turn to period 1. For given period-1 prices  $a_0$  and  $a_1$ , we first characterize the consumer indifferent to products 0 and 1,  $\theta^D$ . Notice, here the consumers in  $[y_0^D, y_1^D]$  always switch brands, even after realizing a high value from their first purchase. Therefore, consumer  $\theta^D$ 's total expected surplus of buying product 0 in period 1 is  $V_0(\theta^D) = (\bar{v} - a_0 - t\theta^D) + [\bar{v} - b_1^S - t(1 - \theta^D)]$ , and that of buying product 1 in period 1 is  $V_1(\theta^D) = [\bar{v} - a_1 - t(1 - \theta^D)] + (\bar{v} - b_0^S - t\theta^D)$ . Setting  $V_0(\theta^D) = V_1(\theta^D)$  and substituting in  $b_0^S$  and  $b_1^S$  yield  $\theta^D = \frac{1}{2} - \frac{3(a_0 - a_1)}{8t}$ . In period 1, firms 0 and 1 set prices  $a_0$  and  $a_1$  to maximize their total expected profits  $\pi_0^D = \theta^D a_0 + R_0^D$  and  $\pi_1^D = (1 - \theta^D)a_1 + R_1^D$ , respectively.

Since  $\frac{d^2 \pi_i^D}{da_i^2} = \frac{-7}{16t} < 0$  for  $i = 0, 1$ , a candidate SPE then follows from the FOCs:  $a_0 = a_1 =$

$a^D$ , where  $a^D = \frac{4t}{3}$ . We can further verify that in period 2 each firm charges price  $b^S = \frac{t}{3}$  to switchers and  $b^R = \frac{2t}{3}$  to repeat customers. Each firm makes total profits  $\pi^D = \frac{17t}{18}$ . In equilibrium,  $x_0^D = \frac{1}{3} - \frac{\lambda(H-L)}{2t}$ ,  $x_1^D = \frac{2}{3} + \frac{\lambda(H-L)}{2t}$ ,  $y_0^D = \frac{1}{3} + \frac{(1-\lambda)(H-L)}{2t}$ ,  $y_1^D = \frac{2}{3} - \frac{(1-\lambda)(H-L)}{2t}$ . Note that  $0 < x_0^D < \frac{1}{2} < x_1^D < 1 \Leftrightarrow \frac{t}{H-L} > \frac{3\lambda}{2}$  and that  $0 < y_0^D < \frac{1}{2} < y_1^D < 1 \Leftrightarrow \frac{t}{H-L} > 3(1-\lambda)$ .

Next, we need to ensure that neither firm has an incentive to unilaterally deviate from the period-2 equilibrium above. Due to symmetry, we focus on firm 0. We see from above that each firm's period-2 prices for switchers and for repeat buyers serve separate market segments. Below, we derive the conditions for firm 0 not to deviate from either price.

First, suppose firm 0 wishes to deviate to a different price for repeat customers,  $b_0^{RD}$ . From the above deduction, it is clear that firm 0 will not deviate to any  $b_0^{RD}$  that induces some of its H customers to switch to firm 1. Therefore, suppose  $b_0^{RD}$  is low enough such that it retains all of its H customers, i.e.,  $H - \frac{t}{2} - b_0^{RD} > \lambda H + (1-\lambda)L - \frac{t}{2} - b^S \Leftrightarrow b_0^{RD} - b^S < (1-\lambda)(H-L)$ . Firm 0's demand from its own repeat customers is  $D_0^{RD} = \frac{\lambda}{2} + \frac{(1-\lambda)[b^S - b_0^{RD} + t - \lambda(H-L)]}{2t}$ . Maximizing  $b_0^{RD} D_0^{RD}$  leads to the optimal deviating price  $b_0^{RD} = \frac{b^S - \lambda(H-L)}{2} + \frac{t}{2(1-\lambda)}$ . However, we have  $b_0^{RD} - b^S < (1-\lambda)(H-L) \Leftrightarrow \frac{t}{H-L} < \frac{3(1-\lambda)(2-\lambda)}{2+\lambda}$ , which never holds when  $\frac{t}{H-L} > \max\{\frac{3\lambda}{2}, 3(1-\lambda)\}$ . Therefore, when  $\frac{t}{H-L} > \max\{\frac{3\lambda}{2}, 3(1-\lambda)\}$ , firm 0 will not unilaterally deviate to a different price for repeat customers.

Second, suppose firm 0 wishes to deviate to a different price for switchers,  $b_0^{SD}$ . From the above deduction, we see that firm 0 will not deviate to any  $b_0^{SD}$  that attracts any of firm 1's H customers. Therefore, suppose  $b_0^{SD}$  is high enough such that it attracts only some of firm 1's L customers, i.e.,  $\lambda H + (1-\lambda)L - \frac{t}{2} - b_0^{SD} < H - \frac{t}{2} - b^R \Leftrightarrow b_0^{SD} > b^R - (1-\lambda)(H-L)$ . Firm 0's period-2 demand from switchers is then  $D_0^{SD} = (1-\lambda)(x_1 - \frac{1}{2}) = (1-\lambda)\left(\frac{b^R - b_0^{SD} + t + \lambda(H-L)}{2t} - \frac{1}{2}\right)$ . Maximizing  $b_0^{SD} D_0^{SD}$  leads to the optimal deviating price,  $b_0^{SD} = \frac{b^R + \lambda(H-L)}{2}$ . We can check that  $b_0^{SD} > b^R - (1-\lambda)(H-L) \Leftrightarrow \frac{t}{H-L} < \frac{3(2-\lambda)}{2}$ . Note that  $\frac{3(2-\lambda)}{2} > \max\{\frac{3\lambda}{2}, 3(1-\lambda)\}$ . Therefore, when  $\frac{t}{H-L} > \frac{3(2-\lambda)}{2}$ , firm 0 will not unilaterally deviate to a different price for switchers. Q.E.D.

**Lemma TA3.** When  $\lambda > \frac{\sqrt{5}-1}{2} \approx 0.618$  and  $\frac{\lambda[(1+2\lambda)\sqrt{1-\lambda}+2(1-\lambda)\sqrt{\lambda}]}{2(2-\lambda)\sqrt{\lambda}-(1+\lambda)\sqrt{1-\lambda}} \leq \frac{t}{H-L} \leq \frac{\lambda(2+\lambda)}{1+\lambda}$ ,

there is a SPE where each firm charges price  $a^D = \frac{2}{3\lambda}[(3-\lambda)t - \lambda(1-\lambda)(H-L)]$  in period 1 and  $b^R = \frac{(1+\lambda)t + \lambda(1-\lambda)(H-L)}{3\lambda}$  to repeat customers and  $b^S = \frac{(2-\lambda)t - \lambda(1-\lambda)(H-L)}{3\lambda}$  to switchers in period 2. In equilibrium, all consumers realizing a low value ( $L$ ) and some of the consumers realizing a high value ( $H$ ) switch brands.

**Proof.** We seek an equilibrium where all consumers realizing a low value switch brands and where some of the consumers realizing a high value switch brands. Because the deduction of the current equilibrium closely parallels that of Lemma TA2, here we will be brief.

We first derive the period-2 price equilibrium. Suppose consumers in  $[0, \theta^D]$  have purchased product 0 and those in  $[\theta^D, 1]$  have purchased product 1 in period 1. Then, firms 0 and 1's period-2 profit functions are

$$R_0^D = \lambda y_0^D b_0^R + [\lambda(y_1^D - \theta^D) + (1-\lambda)(1 - \theta^D)] b_0^S$$

and

$$R_1^D = \lambda(1 - y_1^D) b_1^R + [\lambda(\theta^D - y_0^D) + (1-\lambda)\theta^D] b_1^S,$$

where  $y_0^D$  and  $y_1^D$  are as given in the proof of Lemma TA2 above.

For  $i = 0, 1$ , we have  $\frac{\partial^2 R_i}{\partial (b_i^R)^2} = \frac{\partial^2 R_i}{\partial (b_i^S)^2} = \frac{-\lambda}{t}$  and  $\frac{\partial^2 R_i}{\partial b_i^R \partial b_i^S} = 0$ . The second-order conditions are thus satisfied. From the FOCs, we obtain a unique period-2 price equilibrium:  $b_0^R = \frac{(2\theta+\lambda)t + \lambda(1-\lambda)(H-L)}{3\lambda}$ ,  $b_0^S = \frac{(4-\lambda-4\theta)t - \lambda(1-\lambda)(H-L)}{3\lambda}$ ,  $b_1^R = \frac{(2+\lambda-2\theta)t + \lambda(1-\lambda)(H-L)}{3\lambda}$ , and  $b_1^S = \frac{(4\theta-\lambda)t - \lambda(1-\lambda)(H-L)}{3\lambda}$ . Each firm  $i$ 's period-2 profits are  $R_i = \frac{\lambda}{2t} \left[ (b_i^R)^2 + (b_i^S)^2 \right]$ .

We now turn to period 1. Given period-1 prices  $a_0$  and  $a_1$ , we can easily check that the consumer indifferent to products 0 and 1 is  $\theta^D = \frac{1}{2} - \frac{3\lambda(a_0 - a_1)}{8t}$ . Firms 0 and 1's period-1 objectives are  $\pi_0^D = \theta^D a_0 + R_0^D$  and  $\pi_1^D = (1 - \theta^D) a_1 + R_1^D$ , respectively. Since  $\frac{d^2 \pi_i^D}{da_i^2} = \frac{-7}{16t} < 0$  for  $i = 0, 1$ , the second-order conditions are satisfied. The SPE then follows from the FOCs:  $a_0 = a_1 = a^D$ , where  $a^D = \frac{2}{3\lambda}[(3-\lambda)t - \lambda(1-\lambda)(H-L)]$ . In period 2, each firm charges  $b^R = \frac{(1+\lambda)t + \lambda(1-\lambda)(H-L)}{3\lambda}$  to repeat customers and  $b^S = \frac{(2-\lambda)t - \lambda(1-\lambda)(H-L)}{3\lambda}$  to switchers. We have  $y_0^D = \frac{(1+\lambda)t + \lambda(1-\lambda)(H-L)}{6\lambda t}$  and  $y_1^D = \frac{(-1+5\lambda)t - \lambda(1-\lambda)(H-L)}{6\lambda t}$ . We can easily

check that  $y_0^D > 0$  and  $y_1^D < 1$  always hold, and that  $y_0^D \leq \frac{1}{2} \leq y_1^D \Leftrightarrow \frac{t}{H-L} \geq \frac{\lambda(1-\lambda)}{2\lambda-1}$ . When  $L - b^R \leq \bar{v} - t - b^S \Leftrightarrow \frac{t}{H-L} \leq \frac{\lambda(2+\lambda)}{1+\lambda}$ , those realizing a low value always switch. We also have  $\frac{\lambda(1-\lambda)}{2\lambda-1} \leq \frac{\lambda(2+\lambda)}{1+\lambda} \Leftrightarrow \lambda \geq \frac{\sqrt{5}-1}{2}$ .

Next, we need to ensure that neither firm has an incentive to unilaterally deviate from the period-2 equilibrium above. Due to symmetry, we focus on firm 0. We see from above that each firm's period-2 prices for switchers ( $b^S$ ) and for repeat buyers ( $b^R$ ) serve separate market segments. Below, we derive the conditions for firm 0 not to deviate from either price.

First, suppose firm 0 wishes to deviate to a different price for repeat customers,  $b_0^{RD}$ . Again, firm 0 will not deviate to any  $b_0^{RD}$  that induces some of its H customers to switch to firm 1. Therefore, suppose  $b_0^{RD}$  is low enough such that it retains all of its H customers, i.e.,  $b_0^{RD} - b^S < (1-\lambda)(H-L)$ . We can easily derive the optimal deviating price,  $b_0^{RD} = \frac{b^S - \lambda(H-L)}{2} + \frac{t}{2(1-\lambda)}$ . When  $\lambda > \frac{\sqrt{5}-1}{2}$ , we have  $\lambda^2 - 6\lambda + 2 < 0$  and  $b_0^{RD} - b^S < (1-\lambda)(H-L) \Leftrightarrow \frac{t}{H-L} < \frac{\lambda(1-\lambda)(5-2\lambda)}{-(\lambda^2-6\lambda+2)}$ . When  $\lambda > \frac{\sqrt{5}-1}{2}$  and  $\frac{t}{H-L} > \frac{\lambda(1-\lambda)}{2\lambda-1}$ , the last inequality never holds since  $\frac{\lambda(1-\lambda)(5-2\lambda)}{-(\lambda^2-6\lambda+2)} < \frac{\lambda(1-\lambda)}{2\lambda-1} \Leftrightarrow (1-\lambda)^2 > 0$ . Therefore, firm 0 will not unilaterally deviate from  $b^R$  when  $\lambda > \frac{\sqrt{5}-1}{2}$  and when  $\frac{\lambda(1-\lambda)}{2\lambda-1} \leq \frac{t}{H-L} \leq \frac{\lambda(2+\lambda)}{1+\lambda}$ .

Second, suppose firm 0 wishes to deviate to a different price for switchers,  $b_0^{SD}$ . Again, suppose  $b_0^{SD}$  is high enough such that it attracts only some of firm 1's L customers, i.e.,  $b_0^{SD} > b^R - (1-\lambda)(H-L)$ . Firm 0's period-2 demand from switchers is then  $D_0^{SD} = (1-\lambda) \left( \frac{b^R - b_0^{SD} + t + \lambda(H-L)}{2t} - \frac{1}{2} \right)$ . Maximizing  $b_0^{SD} D_0^{SD}$  leads to the optimal deviating price,  $b_0^{SD} = \frac{b^R + \lambda(H-L)}{2}$ , and the associated profit from switchers,  $\frac{(1-\lambda)[b^R + \lambda(H-L)]^2}{8t}$ . We can check that  $b_0^{SD} > b^R - (1-\lambda)(H-L) \Leftrightarrow \frac{t}{H-L} < \frac{\lambda(5-2\lambda)}{1+\lambda}$ , which always holds when  $\frac{\lambda(1-\lambda)}{2\lambda-1} \leq \frac{t}{H-L} \leq \frac{\lambda(2+\lambda)}{1+\lambda}$ , since  $\frac{\lambda(2+\lambda)}{1+\lambda} < \frac{\lambda(5-2\lambda)}{1+\lambda}$ . From the above deduction process, firm 0's profit from switchers in the candidate equilibrium is  $\frac{\lambda(b^S)^2}{2t}$ . When  $\lambda > \frac{\sqrt{5}-1}{2}$ , we have that  $2(2-\lambda)\sqrt{\lambda} - (1+\lambda)\sqrt{1-\lambda} > 0$  and that  $\frac{(1-\lambda)[b^R + \lambda(H-L)]^2}{8t} < \frac{\lambda(b^S)^2}{2t}$  is equivalent to  $\frac{t}{H-L} > \frac{\lambda[(1+2\lambda)\sqrt{1-\lambda} + 2(1-\lambda)\sqrt{\lambda}]}{2(2-\lambda)\sqrt{\lambda} - (1+\lambda)\sqrt{1-\lambda}}$ . When  $\lambda > \frac{\sqrt{5}-1}{2}$ , we can further verify that  $\frac{\lambda(1-\lambda)}{2\lambda-1} < \frac{\lambda[(1+2\lambda)\sqrt{1-\lambda} + 2(1-\lambda)\sqrt{\lambda}]}{2(2-\lambda)\sqrt{\lambda} - (1+\lambda)\sqrt{1-\lambda}}$  is equivalent to  $2(1-\lambda)\sqrt{1-\lambda} < \lambda\sqrt{\lambda}$ , which always holds. Therefore, when  $\frac{\lambda[(1+2\lambda)\sqrt{1-\lambda} + 2(1-\lambda)\sqrt{\lambda}]}{2(2-\lambda)\sqrt{\lambda} - (1+\lambda)\sqrt{1-\lambda}} \leq \frac{t}{H-L} \leq \frac{\lambda(2+\lambda)}{1+\lambda}$ , firm 0 will not unilaterally deviate from  $b^S$ . Q.E.D.

**Lemma TA4.** (1). *There is no pure-strategy SPE where all consumers realizing a low value switch and no consumer realizing a high value switches in period 2.* (2). *There is no pure-strategy SPE where all consumers switch brands in period 2.*

**Proof.** (1). Suppose there is a pure-strategy SPE where all consumers realizing L switch brands and no consumer realizing H switches brands in period 2. Suppose that in equilibrium consumers in  $[0, \theta]$  purchase product 0 and those in  $[\theta, 1]$  purchase product 1 in period 1, and that firm  $i$  ( $i = 0, 1$ ) charges  $b_i^R$  and  $b_i^S$  to repeat customers and switchers, respectively, in period 2. The firms' period-2 profits are then  $R_0 = \lambda\theta b_0^R + (1 - \lambda)(1 - \theta)b_0^S$  and  $R_1 = \lambda(1 - \theta)b_1^R + (1 - \lambda)\theta b_1^S$ , respectively. After realizing L, consumer 0 switches to product 1 iff  $L - b_0^R \leq \bar{v} - b_1^S - t$ . After purchasing product 0 and realizing H, consumer  $\theta$  will repeat buy product 0 iff  $H - b_0^R - t\theta \geq \bar{v} - b_1^S - t(1 - \theta)$ . We therefore have  $t - \lambda(H - L) \leq b_0^R - b_1^S \leq (1 - \lambda)(H - L) + t(1 - 2\theta)$ . However, if  $b_0^R - b_1^S > t - \lambda(H - L)$ , firm 1 benefits from slightly raising  $b_1^S$ . If  $b_0^R - b_1^S = t - \lambda(H - L)$ , firm 0 benefits from slightly raising  $b_0^R$ . A contradiction.

(2). Suppose there is a pure-strategy SPE where all consumers switch brands in period 2. Suppose that in equilibrium consumers in  $[0, \theta]$  ( $[\theta, 1]$ ) purchase product 0 (1) in period 1. Then, the firms' period-2 profits are  $R_0 = (1 - \theta)b_0^S$  and  $R_1 = \theta b_1^S$ . After realizing  $H$ , consumer 0 switches to 1 iff  $H - b_0^R \leq \bar{v} - b_1^S - t \Leftrightarrow b_0^R \geq b_1^S + t + (1 - \lambda)(H - L)$ . However, by unilaterally deviating to a price  $b_0^R < b_1^S + t + (1 - \lambda)(H - L)$  firm 0 can also sell to some of the consumers who realize H with its product while still selling to all consumers in  $[\theta, 1]$  at price  $b_0^S$ . This strictly increases firm 0's period-2 profits. A contradiction. Q.E.D.

**Proof of Proposition 2.** We note that there are only five possible brand-switching patterns in period 2: (1) only some of the L consumers switch, (2) some of the L and H consumers switch, (3) some of the H consumers and all L consumers switch, (4) all L consumers switch but no H consumer switchers, and (5) all consumers (L and H) switch. Note that the conditions in Lemmas TA1-3 do not overlap. The statements of the Proposition then directly follow from Lemmas TA1-4 above. Q.E.D.

**Lemma TA5.** *Suppose ex ante consumers observe their values of both products. Without BPD, there is a unique symmetric SPE where each firm prices at  $t$  in both periods and makes total profits of  $t$ . With BPD, there is a unique symmetric SPE where each firm prices at  $\frac{4t}{3}$  in period 1 and charges prices  $\frac{2t}{3}$  to repeat customers and  $\frac{t}{3}$  to switchers, making total profits of  $\frac{17t}{18}$ .*

**Proof.** (1). In the inspection good duopoly, ex ante consumers observe their values of both products. Without BPD each consumer's period-2 choice only depends on the firms' period-2 prices, and not on her period-1 purchase history. The equilibrium thus reduces to replications of the static equilibrium, which we now derive. Let  $p_0$  and  $p_1$  denote the prices of firms 0 and 1, respectively, in the static model. There are  $\lambda^2 + (1 - \lambda)^2$  consumers (called the Type-1 consumers) who value both goods equally (at L or H),  $\lambda(1 - \lambda)$  consumers who value good 0 at H and good 1 at L (called the Type-2 consumers), and  $\lambda(1 - \lambda)$  consumers who value good 0 at L and good 1 at H (the Type-3 consumers). Let  $\theta_k$  ( $k = 1, 2, 3$ ) denote the Type- $k$  consumer indifferent between the two goods, i.e.,  $v - t\theta_1 - p_0 = v - t(1 - \theta_1) - p_1$ ,  $H - t\theta_2 - p_0 = L - t(1 - \theta_2) - p_1$ ,  $L - t\theta_3 - p_0 = H - t(1 - \theta_3) - p_1$ . We then have  $\theta_1 = \frac{p_1 - p_0 + t}{2t}$ ,  $\theta_2 = \frac{p_1 - p_0 + t + (H - L)}{2t}$ , and  $\theta_3 = \frac{p_1 - p_0 + t - (H - L)}{2t}$ . Firm 0's demand is

$$D_0 = [\lambda^2 + (1 - \lambda)^2]\theta_1 + \lambda(1 - \lambda)(\theta_2 + \theta_3) = \frac{p_1 - p_0 + t}{2t}.$$

Firms 0 and 1's per-period profit functions are  $\frac{(p_1 - p_0 + t)p_0}{2t}$  and  $[1 - \frac{p_1 - p_0 + t}{2t}]p_1$ , respectively.

The unique equilibrium is then  $p_0 = p_1 = t$ . Each firm thus makes total profits of  $t$ .

(2). Each firm  $i$  ( $i = 0, 1$ ) charges a single price  $a_i$  in period 1 due to the lack of consumer purchase history. In period 2, firm  $i$  charges prices  $b_i^R$  to its repeat buyers and  $b_i^S$  to switchers.

We start with analyzing the period-2 competition. It is simple to verify that in period 1, if a Type- $k$  consumer  $x$  purchases product 0, then the Type- $k$  consumers in  $[0, x)$  will also purchase product 0. Similarly, if a Type- $k$  consumer  $x$  purchases product 1, then the Type- $k$  consumers in  $(x, 1]$  will also purchase product 1. Therefore, without loss of generality let  $\theta_k$

( $k = 1, 2, 3$ ) denote the Type- $k$  consumer indifferent between the two goods in period 1.

We now identify each Type- $k$  consumer's period-2 choice. If a Type-1 consumer  $x$  purchases product 0 in period 1, in period 2 she will repeat purchase 0 if and only if  $v - tx - b_0^R \geq v - t(1-x) - b_1^S$  or  $x \leq x_{1A} \equiv \frac{b_1^S - b_0^R + t}{2t}$ . Here  $v$  equals either  $H$  or  $L$ . If a Type-1 consumer  $x$  purchases product 1 in period 1, she will repeat purchase 1 if and only if  $v - t(1-x) - b_1^R \geq v - tx - b_0^S$  or  $x \geq x_{1B} \equiv \frac{b_1^R - b_0^S + t}{2t}$ . If a Type-2 consumer  $x$  purchases product 0 in period 1, she will repeat purchase 0 if and only if  $H - tx - b_0^R \geq L - t(1-x) - b_1^S$  or  $x \leq x_{2A} \equiv \frac{b_1^S - b_0^R + t + (H-L)}{2t}$ . If a Type-2 consumer  $x$  purchases product 1 in period 1, she will repeat purchase 1 if and only if  $L - t(1-x) - b_1^R \geq H - tx - b_0^S$  or  $x \geq x_{2B} \equiv \frac{b_1^R - b_0^S + t + (H-L)}{2t}$ . Similarly, if a Type-3 consumer  $x$  purchases product 0 in period 1, she will repeat purchase 0 if and only if  $L - tx - b_0^R \geq H - t(1-x) - b_1^S$  or  $x \leq x_{3A} \equiv \frac{b_1^S - b_0^R + t - (H-L)}{2t}$ . If a Type-3 consumer  $x$  purchases product 1 in period 1, she will repeat purchase 1 if and only if  $H - t(1-x) - b_1^R \geq L - tx - b_0^S$  or  $x \geq x_{3B} \equiv \frac{b_1^R - b_0^S + t - (H-L)}{2t}$ .

In period 2, firm 0's demand from repeat customers is

$$D_0^R = [\lambda^2 + (1 - \lambda)^2]x_{1A} + \lambda(1 - \lambda)(x_{2A} + x_{3A}),$$

and its demand from switchers is

$$D_0^S = [\lambda^2 + (1 - \lambda)^2](x_{1B} - \theta_1) + \lambda(1 - \lambda)[(x_{2B} - \theta_2) + (x_{3B} - \theta_3)].$$

Firm 1's demand from repeat customers is

$$D_1^R = [\lambda^2 + (1 - \lambda)^2](1 - x_{1B}) + \lambda(1 - \lambda)[(1 - x_{2B}) + (1 - x_{3B})],$$

and its demand from switchers is

$$D_1^S = [\lambda^2 + (1 - \lambda)^2](\theta_1 - x_{1A}) + \lambda(1 - \lambda)[(\theta_2 - x_{2A}) + (\theta_3 - x_{3A})].$$

Each firm  $i$ 's period-2 profit function is  $R_i = D_i^R b_i^R + D_i^S b_i^S$ . Let  $\Phi \equiv [\lambda^2 + (1 - \lambda)^2]\theta_1 + \lambda(1 - \lambda)(\theta_2 + \theta_3)$ . The firms' period-2 first-order conditions are  $\frac{\partial R_0}{\partial b_0^R} = \frac{b_1^S - 2b_0^R + t}{2t} = 0$ ,  $\frac{\partial R_0}{\partial b_0^S} = \frac{b_1^R - 2b_0^S + t}{2t} - \Phi = 0$ ,  $\frac{\partial R_1}{\partial b_1^R} = 1 - \frac{2b_1^R - b_0^S + t}{2t} = 0$ , and  $\frac{\partial R_1}{\partial b_1^S} = \Phi - \frac{2b_1^S - b_0^R + t}{2t} = 0$ . We can check that  $\frac{\partial R_0}{\partial b_0^R} = 0$  and  $\frac{\partial R_1}{\partial b_1^S} = 0$  jointly lead to  $b_0^R = \frac{(1+2\Phi)t}{3}$  and  $b_1^S = \frac{(-1+4\Phi)t}{3}$ , and that  $\frac{\partial R_0}{\partial b_0^S} = 0$  and  $\frac{\partial R_1}{\partial b_1^R} = 0$  jointly lead to  $b_0^S = \frac{(3-4\Phi)t}{3}$  and  $b_1^R = \frac{(3-2\Phi)t}{3}$ . Straightforward but tedious algebra then verifies  $R_i = \frac{1}{2t} \left[ (b_i^R)^2 + (b_i^S)^2 \right]$ .

Next, we turn to period 1. Recall, by construction  $\theta_k$  ( $k = 1, 2, 3$ ) represents the Type- $k$  consumer indifferent to the two goods in period 1. For example, consider  $\theta_2$ . Buying product 0 in period 1 yields her total surplus  $V_0(\theta_2) = (H - a_0 - t\theta_2) + [L - b_1^S - t(1 - \theta_2)]$ . Buying product 1 yields her total surplus  $V_1(\theta_2) = [L - a_1 - t(1 - \theta_2)] + (H - b_0^S - t\theta_2)$ . That  $V_0(\theta_2) = V_1(\theta_2)$  leads to

$$b_0^S - b_1^S = a_0 - a_1.$$

We can easily check that this relation is also obtained by analyzing the period-1 choices of  $\theta_1$  and  $\theta_3$ . Substituting  $b_0^S$  and  $b_1^S$  into the above equation and rearranging, we have

$$\Phi = \frac{1}{2} - \frac{3(a_0 - a_1)}{8t}.$$

Note that by construction  $\Phi$  stands for firm 0's period-1 demand. Firms 0 and 1's period-1 objective functions are

$$\pi_0 = \left[ \frac{1}{2} - \frac{3(a_0 - a_1)}{8t} \right] a_0 + R_0$$

and

$$\pi_1 = \left[ \frac{1}{2} + \frac{3(a_0 - a_1)}{8t} \right] a_1 + R_1,$$

respectively. The firms' period-1 first-order conditions are  $\frac{d\pi_0}{da_0} = \frac{1}{2} + \frac{-7a_0 + a_1}{16t} = 0$  and  $\frac{d\pi_1}{da_1} = \frac{1}{2} + \frac{a_0 - 7a_1}{16t} = 0$ . These two equations jointly lead to  $a_0 = a_1 = \frac{4t}{3}$  and  $\Phi = \frac{1}{2}$ . We then readily obtain  $b_0^R = b_1^R = \frac{2t}{3}$ ,  $b_0^S = b_1^S = \frac{t}{3}$ . Each firm makes total profits of  $\frac{17t}{18}$ . Q.E.D.
